# Supplementary material for: Association between Dietary Acid Load and Hypertension in Chinese Adults: Analysis of the China Health and Nutrition Survey (2009)
Source: MDPI journal article supplement (doi:10.3390/nu15214664), 2023-11-03
Supplement: s1 [file s1]

## Supplementary Materials

**Table S1:** ORs (and 95% CIs) based on PRAL for hypertension risk.

|                                   | Model 1         | <i>p</i> | Model 2          | <i>p</i> | Model 3          | <i>p</i> |
|-----------------------------------|-----------------|----------|------------------|----------|------------------|----------|
| Age                               |                 |          | 1.06 (1.05-1.07) | <0.001   | 1.06 (1.05-1.07) | <0.001   |
| Gender                            |                 |          |                  |          |                  |          |
| Male                              |                 |          | 1(ref)           |          | 1(ref)           |          |
| Female                            |                 |          | 0.84(0.73-0.95)  | <0.01    | 0.83(0.72-0.94)  | <0.01    |
| PRAL                              |                 |          |                  |          |                  |          |
| Q1                                | 1(ref)          |          | 1(ref)           |          | 1(ref)           |          |
| Q2                                | 0.92(0.81-1.07) | 0.283    | 0.95(0.81-1.11)  | 0.481    | 0.97(0.83-1.14)  | 0.725    |
| Q3                                | 0.88(0.76-1.01) | 0.072    | 0.99(0.84-1.15)  | 0.849    | 1.03(0.87-1.22)  | 0.727    |
| Q4                                | 1.03(0.90-1.19) | 0.646    | 1.24(1.06-1.46)  | <0.01    | 1.34(1.10-1.62)  | <0.01    |
| Marital status                    |                 |          |                  |          |                  |          |
| Single                            |                 |          | 1(ref)           |          | 1(ref)           |          |
| Married                           |                 |          | 0.83(0.56-1.21)  | 0.333    | 0.85(0.58-1.24)  | 0.392    |
| Other                             |                 |          | 0.89(0.58-1.37)  | 0.588    | 0.92(0.60-1.41)  | 0.696    |
| Region                            |                 |          |                  |          |                  |          |
| Urban                             |                 |          | 1(ref)           |          | 1(ref)           |          |
| Rural                             |                 |          | 1.09(0.96-1.23)  | 0.187    | 1.13(0.99-1.28)  | 0.062    |
| Education                         |                 |          |                  |          |                  |          |
| Low                               |                 |          | 1(ref)           |          | 1(ref)           |          |
| Middle                            |                 |          | 0.93(0.82-1.06)  | 0.286    | 0.93(0.82-1.06)  | 0.276    |
| High                              |                 |          | 0.53(0.38-0.74)  | <0.001   | 0.53(0.38-0.74)  | <0.001   |
| Smoking status                    |                 |          |                  |          |                  |          |
| No                                |                 |          | 1(ref)           |          | 1(ref)           |          |
| Yes                               |                 |          | 1.06(0.91-1.23)  | 0.47     | 1.06(0.91-1.23)  | 0.454    |
| Alcohol intake                    |                 |          |                  |          |                  |          |
| No                                |                 |          | 1(ref)           |          | 1(ref)           |          |
| Yes                               |                 |          | 1.14(0.99-1.33)  | 0.074    | 1.14(0.98-1.32)  | 0.083    |
| Hyperuricemia                     |                 |          |                  |          |                  |          |
| No                                |                 |          | 1(ref)           |          | 1(ref)           |          |
| Yes                               |                 |          | 1.23(1.05-1.45)  | <0.05    | 1.25(1.06-1.47)  | <0.05    |
| Diabetes                          |                 |          |                  |          |                  |          |
| No                                |                 |          | 1(ref)           |          | 1(ref)           |          |
| Yes                               |                 |          | 1.44(1.22-1.70)  | <0.001   | 1.43(1.21-1.69)  | <0.001   |
| TC                                |                 |          | 0.97(0.85-1.10)  | 0.587    | 0.97(0.85-1.10)  | 0.604    |
| TG                                |                 |          | 1.07(1.02-1.12)  | <0.005   | 1.07(1.03-1.12)  | <0.005   |
| LDL-C                             |                 |          | 1.07(1.02-1.14)  | <0.05    | 1.07(1.01-1.13)  | <0.05    |
| HDL_C                             |                 |          | 1.05(0.94-1.17)  | 0.394    | 1.06(0.94-1.18)  | 0.347    |
| eGFR (ml/min/1.73m <sup>2</sup> ) |                 |          | 0.99(0.98-0.99)  | <0.05    | 0.99(0.98-0.99)  | <0.05    |
| BMI (kg/m <sup>2</sup> )          |                 |          | 1.16(1.14-1.18)  | <0.001   | 1.16(1.14-1.18)  | <0.001   |
| Sleep duration(hours)             |                 |          |                  |          |                  |          |
| 6-9                               |                 |          | 1(ref)           |          | 1(ref)           |          |

|                 |                 |       |                 |       |
|-----------------|-----------------|-------|-----------------|-------|
| ≤6              | 1.11(0.93-1.33) | 0.248 | 1.09(0.91-1.30) | 0.378 |
| ≥9              | 0.96(0.84-1.10) | 0.589 | 0.96(0.84-1.10) | 0.579 |
| Energy (Kcal)   |                 |       | 1.00(1.00-1.01) | 0.128 |
| Sodium, per 1SD |                 |       | 1.09(1.02-1.16) | <0.05 |
| Dietary fiber   |                 |       |                 |       |
| Q1              |                 |       | 1(ref)          |       |
| Q2              |                 |       | 0.96(0.83-1.10) | 0.528 |
| Q3              |                 |       | 1.15(0.98-1.35) | 0.097 |

PRAL: potential renal acid load; TC: total cholesterol; TG: triglycerides; LDL-C: low-density lipoprotein cholesterol; HDL-C: high-density lipoprotein cholesterol; BMI: body mass index; eGFR: estimated glomerular filtration rate.

**Table S2:** ORs (and 95% CIs) based on NEAP for hypertension risk.

|                | Model 1         | <i>p</i> | Model 2          | <i>p</i> | Model 3         | <i>p</i> |
|----------------|-----------------|----------|------------------|----------|-----------------|----------|
| Age            |                 |          | 1.06 (1.05-1.06) | <0.001   | 1.06(1.05-1.07) | <0.001   |
| Gender         |                 |          |                  |          |                 |          |
| Male           |                 |          | 1(ref)           |          | 1(ref)          |          |
| Female         |                 |          | 0.83(0.72-0.94)  | <0.005   | 0.84(0.73-0.95) | <0.01    |
| NEAP           |                 |          |                  |          |                 |          |
| Q1             | 1(ref)          |          | 1(ref)           |          | 1(ref)          |          |
| Q2             | 0.92(0.81-1.07) | 0.283    | 1.07(0.91-1.25)  | 0.423    | 1.09(0.93-1.28) | 0.303    |
| Q3             | 0.88(0.76-1.01) | 0.072    | 1.17(1.00-1.37)  | 0.051    | 1.12(1.03-1.43) | <0.05    |
| Q4             | 1.03(0.90-1.19) | 0.646    | 1.23(1.05-1.44)  | <0.05    | 1.29(1.09-1.53) | <0.005   |
| Marital status |                 |          |                  |          |                 |          |
| Single         |                 |          | 1(ref)           |          | 1(ref)          |          |
| Married        |                 |          | 0.84(0.57-1.23)  | 0.369    | 0.84(0.58-1.24) | 0.385    |
| Other          |                 |          | 0.90(0.59-1.39)  | 0.636    | 0.92(0.60-1.41) | 0.693    |
| Region         |                 |          |                  |          |                 |          |
| Urban          |                 |          | 1(ref)           |          | 1(ref)          |          |
| Rural          |                 |          | 1.09(0.96-1.23)  | 0.203    | 1.10(0.97-1.25) | 0.131    |
| Education      |                 |          |                  |          |                 |          |
| Low            |                 |          | 1(ref)           |          | 1(ref)          |          |
| Middle         |                 |          | 0.93(0.82-1.06)  | 0.274    | 0.92(0.81-1.04) | 0.19     |
| High           |                 |          | 0.53(0.38-0.74)  | <0.001   | 0.52(0.37-0.73) | <0.001   |
| Smoking status |                 |          |                  |          |                 |          |
| No             |                 |          | 1(ref)           |          | 1(ref)          |          |
| Yes            |                 |          | 1.06(0.91-1.23)  | 0.471    | 1.06(0.91-1.24) | 0.435    |
| Alcohol intake |                 |          |                  |          |                 |          |
| No             |                 |          | 1(ref)           |          | 1(ref)          |          |
| Yes            |                 |          | 1.15(0.99-1.33)  | 0.061    | 1.14(0.98-1.32) | 0.085    |
| Hyperuricemia  |                 |          |                  |          |                 |          |
| No             |                 |          | 1(ref)           |          | 1(ref)          |          |
| Yes            |                 |          | 1.24(1.05-1.46)  | <0.05    | 1.24(1.06-1.46) | <0.01    |
| Diabetes       |                 |          |                  |          |                 |          |

|                                   |                 |        |                 |        |
|-----------------------------------|-----------------|--------|-----------------|--------|
| No                                | 1(ref)          |        | 1(ref)          |        |
| Yes                               | 1.43(1.21-1.69) | <0.001 | 1.43(1.20-1.68) | <0.001 |
| TC                                | 0.97(0.85-1.10) | 0.58   | 0.97(0.85-1.10) | 0.626  |
| TG                                | 1.07(1.03-1.11) | <0.005 | 1.07(1.03-1.12) | <0.005 |
| LDL-C                             | 1.07(1.01-1.14) | <0.05  | 1.07(1.01-1.14) | <0.05  |
| HDL_C                             | 1.05(0.94-1.17) | 0.381  | 1.05(0.94-1.18) | 0.351  |
| eGFR (ml/min/1.73m <sup>2</sup> ) | 0.99(0.98-0.99) | <0.05  | 0.99(0.98-0.99) | <0.05  |
| BMI (kg/m <sup>2</sup> )          | 1.17(1.14-1.19) | <0.001 | 1.16(1.14-1.18) | <0.001 |
| Sleep duration(hours)             |                 |        |                 |        |
| 6-9                               | 1(ref)          |        | 1(ref)          |        |
| ≤6                                | 1.11(0.93-1.33) | 0.239  | 1.09(0.91-1.31) | 0.346  |
| ≥9                                | 0.96(0.83-1.10) | 0.527  | 0.96(0.83-1.10) | 0.538  |
| Energy(Kcal)                      |                 |        | 1.00(1.00-1.01) | 0.18   |
| Sodium, per 1SD                   |                 |        | 1.07(1.01-1.14) | 0.04   |
| Dietary fiber                     |                 |        |                 |        |
| Q1                                |                 |        | 1(ref)          |        |
| Q2                                |                 |        | 0.97(0.84-1.12) | 0.698  |
| Q3                                |                 |        | 1.18(1.01-1.37) | <0.05  |

NEAP: net endogenous acid production; TC: total cholesterol; TG: triglycerides; LDL-C: low-density lipoprotein cholesterol; HDL-C: high-density lipoprotein cholesterol; BMI: body mass index; eGFR: estimated glomerular filtration rate.

**Table S3:** ORs (and 95%CI) of PRAL, NEAP and hypertension risk in subjects with physical activity deficit exclusion (adjusted with model 3).

| PRAL | Model 3         |          | NEAP | Model 3         |          |
|------|-----------------|----------|------|-----------------|----------|
|      | OR (95%CI)      | <i>p</i> |      | OR (95%CI)      | <i>p</i> |
| Q1   | 1(ref)          |          | Q1   | 1(ref)          |          |
| Q2   | 1.00(0.81-1.24) | 0.982    | Q2   | 1.22(0.98-1.51) | 0.074    |
| Q3   | 1.02(0.83-1.26) | 0.858    | Q3   | 1.22(0.98-1.53) | 0.077    |
| Q4   | 1.32(1.07-1.63) | 0.009    | Q4   | 1.33(1.04-1.68) | 0.021    |

PRAL: potential renal acid load; NEAP: net endogenous acid production.

**Table S4:** ORs (and 95%CI) of PRAL, NEAP and hypertension risk in non-diabetic subjects (adjusted with model 3).

| PRAL | Model 3         |          | NEAP | Model 3         |          |
|------|-----------------|----------|------|-----------------|----------|
|      | OR (95%CI)      | <i>p</i> |      | OR (95%CI)      | <i>p</i> |
| Q1   | 1(ref)          |          | Q1   | 1(ref)          |          |
| Q2   | 0.97(0.82-1.15) | 0.751    | Q2   | 1.07(0.90-1.27) | 0.458    |
| Q3   | 1.01(0.85-1.20) | 0.939    | Q3   | 1.23(1.03-1.46) | 0.022    |
| Q4   | 1.29(1.09-1.53) | 0.004    | Q4   | 1.35(1.12-1.61) | 0.001    |

PRAL: potential renal acid load; NEAP: net endogenous acid production.

**Table S5:** ORs (and 95%CI) of PRAL, NEAP and hypertension risk in subjects with eGFR $\geq$  60 ml/min/1.73m<sup>2</sup> (adjusted with model 3).

| PRAL | Model 3         |          | NEAP | Model 3         |          |
|------|-----------------|----------|------|-----------------|----------|
|      | OR (95%CI)      | <i>p</i> |      | OR (95%CI)      | <i>p</i> |
| Q1   | 1(ref)          |          | Q1   | 1(ref)          |          |
| Q2   | 0.99(0.83-1.18) | 0.925    | Q2   | 1.09(0.92-1.30) | 0.330    |
| Q3   | 1.12(0.93-1.34) | 0.222    | Q3   | 1.25(1.05-1.48) | 0.014    |
| Q4   | 1.41(1.14-1.74) | 0.001    | Q4   | 1.34(1.12-1.61) | 0.002    |

PRAL: potential renal acid load; NEAP: net endogenous acid production; eGFR: estimated glomerular filtration rate.
